# Supplementary material for: Enhancement in the water resistance and thermal stability of Na3HTiF8:Mn4+ by co-doping with organic amine cations
Source: Royal Society of Chemistry journal article supplement (doi:10.1039/d2dt03438g), 2022-01-01
Supplement: d2dt03438g1.pdf [file d2dt03438g1.pdf]

## Supplementary materials

### Enhancement of water resistance thermal and stability of $\text{Na}_3\text{HTiF}_8:\text{Mn}^{4+}$ by co-doping with organic amine cation

*Daishu Deng<sup>a</sup>, Jun Lei<sup>a</sup>, Yuelan Li<sup>a</sup>, Lin Wang<sup>a</sup>, Tianman Wang<sup>a</sup>,*

*Huizhong Wen<sup>a</sup>, Sen Liao<sup>\*ab</sup>, Yingheng Huang<sup>\*a,b</sup>*

*<sup>a</sup> School of Chemistry and Chemical Engineering, Guangxi University, Nanning, Guangxi, 530004, China*

*<sup>b</sup> Guangxi Key Laboratory of Processing for Non-ferrous Metals and Featured Materials, School of Resources,*

*Environment and Materials, Guangxi University, Nanning, Guangxi, 530004, China*

#### 2.2 Experimental and methodology section

##### 2.1 Reagent and apparatus

All chemicals were reagent-grade pure and purchased from the Sinopharm Chemical Reagent Co. Ltd., China. XRD was performed at a scanning rate of  $5^\circ/\text{min}$  from  $10^\circ$  to  $80^\circ$  for  $2\theta$  at room temperature by using a Rigaku D/max2500 V diffractometer. It was equipped with a graphite monochromator by utilizing monochromatic  $\text{CuK}\alpha$  radiation ( $\lambda = 0.154178 \text{ nm}$ ). The morphologies of the samples were examined by Hitachi S-3400 scanning electron microscopy (SEM) with an attached energy-dispersive X-ray spectrometer (EDS). The structure of the phosphor interior was measured by transmission electron microscope (TEM). Samples were mounted on an aluminum slice coated with Au. The photoluminescence excitation (PLE) and

---

\* Corresponding author. Tel./Fax: +86 771 3233718, School of Chemistry and Chemical Engineering, Guangxi University, E-mail address: liaosen@gxu.edu.cn (S. Liao), [huangyingheng@163.com](mailto:huangyingheng@163.com) (Y.H. Huang).

emission (PL) spectra were recorded at room temperature by a Shimadzu RF-53001 spectrophotometer equipped with a xenon lamp as the excitation source. The luminescence decay curve and the photoluminescence quantum yields were obtained from an Edinburgh FLS980 fluorescence spectrophotometer. The performance of WLEDs was measured using an auto temperatured LED opto-electronic analyzer (ATA-1000, Everfine). The results of the equations presented in the paper were obtained by using the programs compiled with VBA (Visual Basic for Applications) by ourselves.

## 2.2 Synthesis of samples

### 2.2.1 $K_2MnF_6$

4.5 g  $KMnO_4$  and 45.0 g  $KHF_2$  were dissolved in 150 ml HF (40%) solution, stirring for 30 min. Dropping 30%  $H_2O_2$  into the above solution slowly, after filtering by ethanol and drying at 70 °C for 2 hours, the yellow powder of  $K_2MnF_6$  was obtained

### 2.2.2 $Na_2TiF_6:xMn^{4+}$ (NTFM, $x = 0.02-0.10$ )

To synthesize the  $Na_2TiF_6$  matrix,  $Na_2CO_3$  was dripped into  $H_2TiF_6$  and dried at 70 °C. Solution A was obtained by adding 1.2mmol  $K_2MnF_6$  to 15 mL HF. After stirring for 15 minutes, 20 mmol  $Na_2TiF_6$  was added to A and stirred for 30 minutes to obtain NTFM. Samples of  $Na_2TiF_6:xMn^{4+}$  ( $x = 0.02-0.10$ ) were prepared by using the same processes.

### 2.2.3 $Na_3HTiF_8:y(C_2H_5OH)_3NH^+$ ( $NTF:yTEOAH^+$ , $y = 0.01-0.30$ )

Firstly, 0.2-2 mmol  $(C_2H_5OH)_3N$  was slowly added into 20 mmol  $H_2TiF_6$  solutions with stirring, and then  $Na_2CO_3$  was put into the mixture until the pH of the solution

reaches 7. Then, the precipitates were collected, suction filtered, and dried at 70 °C for 5 hours, and the powder of NHTF:yTEOAH<sup>+</sup> (y = 0.01-0.30) were obtained.

#### 2.2.4 Na<sub>3</sub>HTiF<sub>8</sub>:0.06Mn<sup>4+</sup>,yC<sub>2</sub>H<sub>5</sub>OH)<sub>3</sub>NH<sup>+</sup> (NHTFM:yTEAOH<sup>+</sup>)

1.2 mmol (0.2966 g) K<sub>2</sub>MnF<sub>6</sub> were dissolved in 15 ml HF (40%) to obtain yellow solution, 18.8 mmol NHTF:yTEOAH<sup>+</sup> (x = Mn/(Mn+Ti) = 0.06) were put into the solution and stirring for 30 minutes respectively. Then, the depositions were filtered, washed with acetone several times, and dried at 70 °C for 3 hours to obtain samples of NHTFM:yTEOAH<sup>+</sup> (y = 0.01-0.30).

### 3 The negative thermal quenching

The value of  $Dq/B$  can be described with Eqs. (S1–S4) [39-41].

$$Dq = \frac{E(^4A_{2g} - ^4T_{2g})}{10} \quad (1)$$

$$x = \frac{E(^4A_2 - ^4T_1) - E(^4A_2 - ^4T_2)}{Dq} \quad (2)$$

$$\frac{Dq}{B} = \frac{15(x - 8)}{x^2 - 10x} \quad (3)$$

$$B = \frac{(x^2 - 10x) * Dq}{15(x - 18)} \quad (4)$$

Where  $B$  is Racah parameters, and  $Dq$  is crystal-field splitting parameter.  $E$  is the energy of different energy levels.

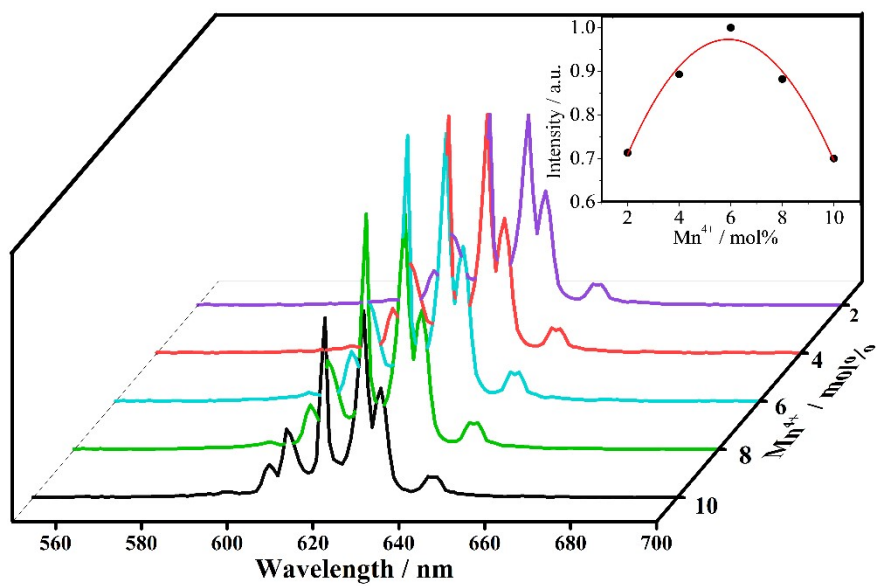

Fig. S1 PL spectra of NTF:xMn<sup>4+</sup> ( $x = 0.02-0.1$ ).

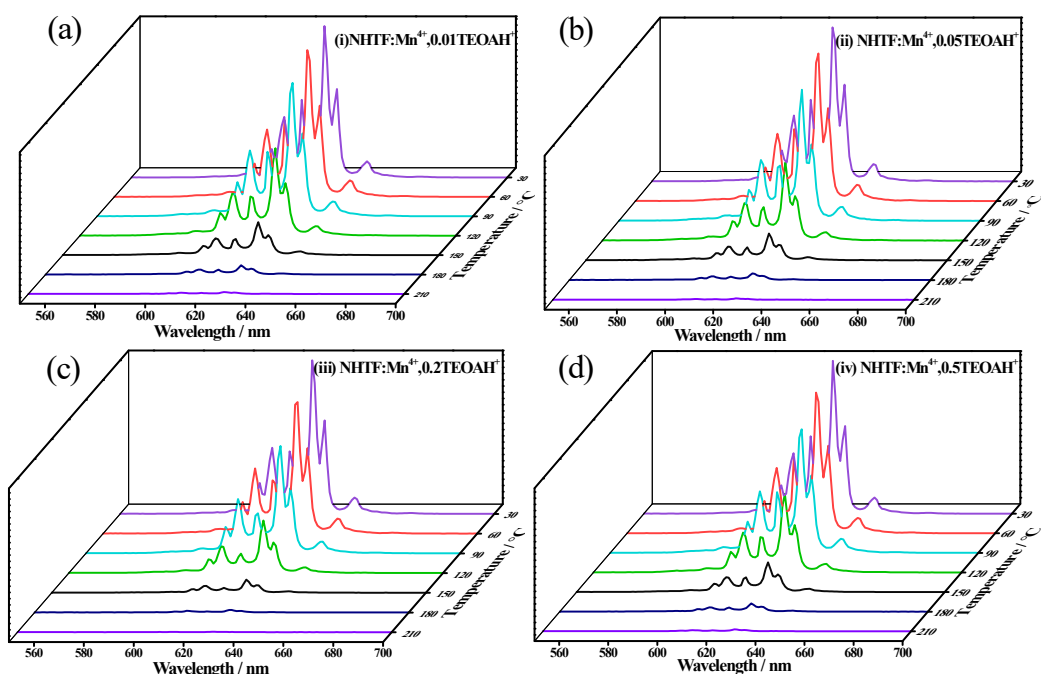

**Fig. S2** PL spectra of samples: (a) NHTFM:0.01TEOAH<sup>+</sup>, (b) NHTFM:0.05TEOAH<sup>+</sup>, (c) NHTFM:0.20TEOAH<sup>+</sup>, (d) NHTFM:0.30TEOAH<sup>+</sup>.

**Table S1.** XRD refined lattice parameters of the samples

| No.                                     | a / Å  | b / Å  | c / Å  | $\alpha = \beta = \gamma / ^\circ$ | V / Å <sup>3</sup> |
|-----------------------------------------|--------|--------|--------|------------------------------------|--------------------|
| (i)                                     | 7.1874 | 13.850 | 6.5479 | 90                                 | 651.55             |
| (ii)                                    | 7.1676 | 13.854 | 6.5456 | 90                                 | 649.99             |
| (iii)                                   | 7.1282 | 13.730 | 6.5054 | 90                                 | 636.67             |
| (iv)                                    | 7.2051 | 13.872 | 6.5512 | 90                                 | 654.76             |
| (v)                                     | 7.2146 | 13.871 | 6.5524 | 90                                 | 655.72             |
| Na <sub>3</sub> HTiF <sub>8</sub> (PDF) | 7.1820 | 13.860 | 6.5380 | 90                                 | 650.80             |

(i-v) NHTFM:yTEOAH<sup>+</sup> (y<sub>i-v</sub> = 0.01, 0.05, 0.15, 0.20, 0.30)**Table S2.** Rietveld refinement of X-ray powder diffraction data of NTFM.

|     | x/a         | y/b         | z/c        | Mult | U <sub>ISO</sub> |
|-----|-------------|-------------|------------|------|------------------|
| F2  | 0.23741(28) | 0.76259(28) | 0.7698(9)  | 6    | 0.025            |
| F1  | 0.10254(28) | 0.89746(28) | 0.2017(7)  | 6    | 0.0388(16)       |
| F3  | 0.4238(5)   | 0.5762(5)   | 0.2240(12) | 6    | 0.0939(16)       |
| Ti1 | 0.0         | 0.0         | 0.0        | 1    | 0.0304           |
| Ti2 | 0.3333      | 0.6667      | 0.5445(8)  | 2    | 0.02874          |
| Na1 | 0.3570(4)   | 0.0         | 0.0        | 6    | 0.0751(18)       |

**Table S3.** Rietveld refinement of X-ray powder diffraction data of NHTFM:0.01TEOAH<sup>+</sup>.

| Atom | x/a       | y/b         | z/c        | Mult | U <sub>ISO</sub> |
|------|-----------|-------------|------------|------|------------------|
| F2   | 0.1848(6) | 0.23598(29) | 0.25       | 8    | 0.0393(9)        |
| F1   | 0.18035   | 0.05397     | 0.25       | 8    | 0.0393(9)        |
| F3   | 0.0       | 0.15173(32) | -0.0413(7) | 8    | 0.0327           |
| Na1  | 0.0       | 0.67772(35) | 0.25       | 4    | 0.0291(8)        |
| Na2  | 0.2452(5) | 0.39702(24) | 0.25       | 8    | 0.0291(8)        |
| Ti1  | 0.0       | 0.14447(18) | 0.25       | 4    | 0.02398          |
| F4   | 0.0       | 0.41807(30) | 0.0307(6)  | 8    | 0.0393(9)        |
| H    | 0.0       | 0.5         | 0          | 4    | 0.15452          |
